# Supplementary material for: Migration, hotspots, and dispersal of HIV infection in Rakai, Uganda
Source: PubMed Central journal article supplement (PMC7033206; doi:10.1038/s41467-020-14636-y), 2020-02-20
Supplement: 41467_2020_14636_MOESM1_ESM.pdf [file 41467_2020_14636_MOESM1_ESM.pdf]

Supplementary Information for  
**Migration, hotspots, and dispersal of HIV infection in Rakai, Uganda**

Grabowski, et al.

**Supplementary Table 1:** RCCS survey participation rates in RCCS R15 and RCCS R16 among long-term residents and in-migrants and out-migrants by age, sex, and place of residence at census.

|                           | RCCS R15 (N=23,415)  |                 |          | RCCS R16 (N=26,084)  |                 |          |
|---------------------------|----------------------|-----------------|----------|----------------------|-----------------|----------|
|                           | Long-term residents* | Out-migrants    | p-value† | Long-term residents* | In-migrants     | p-value† |
| <b>Overall</b>            | 12596/17830 (71%)    | 3284/5585 (59%) | <0.001   | 13186/20586 (64%)    | 3665/5498 (67%) | <0.001   |
| <b>Sex</b>                |                      |                 |          |                      |                 |          |
| Men                       | 5953/9133 (65%)      | 1422/2637 (54%) | <0.001   | 6331/10676 (59%)     | 1450/2445 (59%) | 1.0      |
| Women                     | 6643/8697 (76%)      | 1862/2948 (63%) | <0.001   | 6855/9910 (69%)      | 2215/3053 (73%) | <0.001   |
| <b>Age (years)</b>        |                      |                 |          |                      |                 |          |
| 15-19                     | 1947/3461 (56%)      | 775/1541 (50%)  | <0.001   | 2313/4566 (51%)      | 670/1027 (65%)  | <0.001   |
| 20-24                     | 1927/2785 (69%)      | 860/1411 (61%)  | <0.001   | 1918/3191 (60%)      | 1098/1530 (72%) | <0.001   |
| 25-29                     | 2442/3340 (73%)      | 669/1106 (60%)  | <0.001   | 2248/3498 (64%)      | 799/1233 (65%)  | 0.52     |
| 30-34                     | 2377/3133 (76%)      | 498/757 (66%)   | <0.001   | 2362/3402 (69%)      | 530/814 (65%)   | 0.019    |
| 35-39                     | 1937/2525 (77%)      | 273/428 (64%)   | <0.001   | 2011/2804 (72%)      | 327/510 (64%)   | <0.001   |
| ≥40                       | 1966/2586 (76%)      | 209/342 (61%)   | <0.001   | 2334/3125 (75%)      | 241/394 (61%)   | <0.001   |
| <b>Place of residence</b> |                      |                 |          |                      |                 |          |
| Agrarian                  | 8144/11264 (72%)     | 1783/2927 (61%) | <0.001   | 8934/13012 (69%)     | 1725/2402 (72%) | 0.002    |
| Trading                   | 1521/2716 (56%)      | 562/1211 (46%)  | <0.001   | 1543/3255 (47%)      | 725/1229 (59%)  | <0.001   |
| Fish landing site         | 2931/3850 (76%)      | 939/1447 (65%)  | <0.001   | 2709/4319 (63%)      | 1215/1867 (65%) | 0.082    |

Of the 7535 non-participants in RCCS R15, 7122 (95%) were away for work/school, 167 (2%) refused to participate, and 246 (3%) did not participate for other reasons; Of the 9233 non-participants in RCCS R16, 8910 (97%) were away for work/school, 80 (1%) refused to participate, and 243 (3%) did not participate for other reasons; Long-term residents are considered anyone who was not classified as an out-migrant at RCCS R15 (i.e., moved out of study communities between survey rounds) or an in-migrant at RCCS R16 (i.e. moved into study communities between rounds); † Chi-squared p-value

**Supplementary Table 2:** Factors associated with successful geocoding\* of migrant place of destination/origin

|                               | Out-migrants (N=5,585)          |         | In-migrants (N=5,498)            |         |
|-------------------------------|---------------------------------|---------|----------------------------------|---------|
|                               | No. successfully geocoded/Total | p-value | No. successfully geocoded /Total | p-value |
| <b>Overall</b>                | 4122/5585 (74%)                 |         | 4637/5498 (84%)                  |         |
| <b>Sex</b>                    |                                 |         |                                  |         |
| Men                           | 2196/2948 (74%)                 |         | 2005/2445 (82%)                  |         |
| Women                         | 1926/2637 (73%)                 | 0.229   | 2634/3053 (86%)                  | <0.001  |
| <b>Age (years)</b>            |                                 |         |                                  |         |
| 15-19                         | 1303/1541 (85%)                 |         | 895/1027 (87%)                   |         |
| 20-24                         | 1047/1411 (74%)                 |         | 1318/1530 (86%)                  |         |
| 25-29                         | 741/1106 (67%)                  |         | 1018/1223 (83%)                  |         |
| 30-34                         | 513/757 (68%)                   |         | 656/814 (81%)                    |         |
| 35-39                         | 291/428 (68%)                   |         | 419/510 (82%)                    |         |
| ≥40                           | 227/342 (66%)                   | <0.001  | 331/394 (84%)                    | 0.001   |
| <b>Place of residence</b>     |                                 |         |                                  |         |
| Agrarian                      | 2375/2927 (81%)                 |         | 2040/2402 (85%)                  |         |
| Trading                       | 753/1211 (62%)                  |         | 1002/1229 (82%)                  |         |
| Fish landing site             | 994/1447 (69%)                  | <0.001  | 1595/1867 (85%)                  | 0.008   |
| <b>Reason for Move†</b>       |                                 |         |                                  |         |
| Marriage                      | 148/153 (97%)                   |         | 758/841 (90%)                    |         |
| Divorced/separated            | 394/518 (76%)                   |         | 6/6 (100%)                       |         |
| Work                          | 1706/1943 (88%)                 |         | 1909/2209 (86%)                  |         |
| Education                     | 66/69 (96%)                     |         | 41/46 (89%)                      |         |
| Started a new household       | 535/703 (76%)                   |         | 480/609 (79%)                    |         |
| Living with relatives/friends | 1167/1435 (81%)                 |         | 1316/1499 (88%)                  |         |
| Don't know                    | 103/712 (14%)                   |         | 2/2 (100%)                       |         |
| Other                         | 3/3 (100%)                      | <0.001  | 125/153 (82%)                    | <0.001  |

\*Community of destination and community of origin were recorded as free responses at time of census for out-migrants and in-migrants, respectively. These places were geocoded using Google Earth by trained Ugandan investigators. Factors associated with successful geocoding (GPS)/unsuccessful geocoding (NO GPS) are shown in the table. † Information on reason for movement was missing for 49 out-migrants and 133 in-migrants and all of these persons did not have an identifiable place of origin or destination (e.g. GPS data).

**Supplementary Table 3a:** Female HIV prevalence among in-migrants and out-migrants versus long-term residents at RCCS R15 and R16, respectively.

| <b>Female HIV prevalence among out-migrants and long-term residents at R15</b> |                                                                                       |                                                                                |                    |                |                                  |                |
|--------------------------------------------------------------------------------|---------------------------------------------------------------------------------------|--------------------------------------------------------------------------------|--------------------|----------------|----------------------------------|----------------|
| <b>Community Type</b>                                                          | <b>HIV prevalence among long-term residents (HIV positive cases/Total population)</b> | <b>HIV prevalence among out-migrants (HIV positive cases/Total population)</b> | <b>PRR (95%CI)</b> | <b>p-value</b> | <b>Age adjusted PRR* (95%CI)</b> | <b>p-value</b> |
| All Communities                                                                | 23% (1543/6643)                                                                       | 27% (495/1862)                                                                 | 1.14 (1.03-1.27)   | 0.009          | 1.27 (1.14-1.41)                 | <0.001         |
| Agrarian communities                                                           | 16% (707/4383)                                                                        | 17% (178/1030)                                                                 | 1.07 (0.90-1.26)   | 0.41           | 1.50 (1.26-1.58)                 | <0.001         |
| Trading Communities                                                            | 19% (176/896)                                                                         | 21% (70/337)                                                                   | 1.06 (0.80-1.39)   | 0.69           | 1.28 (0.95-1.69)                 | 0.095          |
| Fishing Communities                                                            | 48% (660/1364)                                                                        | 50% (247/495)                                                                  | 1.03 (0.89-1.19)   | 0.68           | 1.14 (0.98-1.32)                 | 0.077          |

  

| <b>Female HIV prevalence among in-migrants and long-term residents at R16</b> |                                                                                       |                                                                               |                    |                |                                  |                |
|-------------------------------------------------------------------------------|---------------------------------------------------------------------------------------|-------------------------------------------------------------------------------|--------------------|----------------|----------------------------------|----------------|
| <b>Community Type</b>                                                         | <b>HIV prevalence among long-term residents (HIV positive cases/Total population)</b> | <b>HIV prevalence among in-migrants (HIV positive cases/Total population)</b> | <b>PRR (95%CI)</b> | <b>p-value</b> | <b>Age adjusted PRR* (95%CI)</b> | <b>p-value</b> |
| All Communities                                                               | 21% (1460/6855)                                                                       | 26% (574/2215)                                                                | 1.22 (1.10-1.34)   | <0.001         | 1.30 (1.18-1.48)                 | <0.001         |
| Agrarian communities                                                          | 15% (712/4711)                                                                        | 19% (212/1115)                                                                | 1.26 (1.08-1.46)   | 0.003          | 1.64 (1.39-1.92)                 | <0.001         |
| Trading Communities                                                           | 19% (172/909)                                                                         | 18% (83/472)                                                                  | 0.93 (0.71-1.20)   | 0.58           | 1.25 (0.95-1.65)                 | 0.11           |
| Fishing Communities                                                           | 47% (576/1235)                                                                        | 44% (279/628)                                                                 | 0.95 (0.82-1.10)   | 0.51           | 1.08 (0.93-1.26)                 | 0.29           |

PRR=Prevalence Risk ratio; 95% CI= 95% confidence interval; RCCS=Rakai Community Cohort Study; adjPRR=adjusted PRR;

\*Overall analysis for all communities adjusted for age and community-type.

**Supplementary Table 3b:** Male HIV prevalence among in-migrants and out migrants versus long-term residents at RCCS R15 and R16, respectively.

| <b>Male HIV prevalence among out-migrants and long-term residents at R15</b> |                                                                                       |                                                                                |                    |                |                                  |                |
|------------------------------------------------------------------------------|---------------------------------------------------------------------------------------|--------------------------------------------------------------------------------|--------------------|----------------|----------------------------------|----------------|
| <b>Community Type</b>                                                        | <b>HIV prevalence among long-term residents (HIV positive cases/Total population)</b> | <b>HIV prevalence among out-migrants (HIV positive cases/Total population)</b> | <b>PRR (95%CI)</b> | <b>p-value</b> | <b>Age adjusted PRR* (95%CI)</b> | <b>p-value</b> |
| All Communities                                                              | 18% (1050/5953)                                                                       | 16% (223/1422)                                                                 | 0.89 (0.77-1.03)   | 0.11           | 0.96 (0.82-1.11)                 | 0.56           |
| Agrarian communities                                                         | 11% (414/3761)                                                                        | 10% (72/753)                                                                   | 0.87 (0.67-1.11)   | 0.27           | 1.17 (0.89-1.49)                 | 0.23           |
| Trading Communities                                                          | 12% (74/625)                                                                          | 10% (22/225)                                                                   | 0.83 (0.50-1.31)   | 0.43           | 1.04 (0.63-1.66)                 | 0.86           |
| Fishing Communities                                                          | 36% (562/1567)                                                                        | 29% (129/444)                                                                  | 0.81 (0.67-0.98)   | 0.031          | 0.86 (0.71-1.04)                 | 0.14           |
| <b>Male HIV prevalence among in-migrants and long-term residents at R16</b>  |                                                                                       |                                                                                |                    |                |                                  |                |
| <b>Community Type</b>                                                        | <b>HIV prevalence among long-term residents (HIV positive cases/Total population)</b> | <b>HIV prevalence among in-migrants (HIV positive cases/Total population)</b>  | <b>PRR (95%CI)</b> | <b>p-value</b> | <b>Age adjusted PRR* (95%CI)</b> | <b>p-value</b> |
| All Communities                                                              | 16% (1014/6331)                                                                       | 16% (230/1450)                                                                 | 0.99 (0.86-1.14)   | 0.90           | 0.90 (0.78-1.04)                 | 0.16           |
| Agrarian communities                                                         | 10% (432/4223)                                                                        | 10% (59/610)                                                                   | 0.95 (0.73-1.23)   | 0.69           | 1.06 (0.80-1.39)                 | 0.69           |
| Trading Communities                                                          | 10% (65/634)                                                                          | 9% (23/253)                                                                    | 0.89 (0.54-1.40)   | 0.62           | 1.10 (0.66-1.77)                 | 0.70           |
| Fishing Communities                                                          | 35% (517/1474)                                                                        | 25% (148/587)                                                                  | 0.72 (0.59-0.86)   | <0.001         | 0.81 (0.67-0.98)                 | 0.029          |

PRR=Prevalence Risk ratio; 95% CI= 95% confidence interval; RCCS=Rakai Community Cohort Study; adjPRR=adjusted PRR;

\*Overall analysis for all communities adjusted for age and community-type.

**Supplementary Table 4:** Prevalence risk ratios comparing HIV prevalence among in-migrants at R16 vs. HIV prevalence among out-migrants at R15 stratified by community type and sex.

**HIV prevalence among female in-migrants at R16 vs. HIV prevalence among female out-migrants at R15**

| Community Type       | PRR (95%CI)      | p-value | Age adjusted PRR* |         |
|----------------------|------------------|---------|-------------------|---------|
|                      |                  |         | (95%CI)           | p-value |
| All Communities      | 0.97 (0.86-1.10) | 0.68    | 0.95 (0.84-1.07)  | 0.42    |
| Agrarian communities | 1.10 (0.90-1.34) | 0.35    | 1.03 (0.84-1.26)  | 0.78    |
| Trading Communities  | 0.85 (0.61-1.17) | 0.31    | 0.89 (0.65-1.23)  | 0.50    |
| Fishing Communities  | 0.89 (0.75-1.06) | 0.18    | 0.89 (0.75-1.06)  | 0.18    |

**HIV prevalence among male in-migrants at R16 vs. HIV prevalence among male out-migrants at R15**

| Community Type       | PRR (95%CI)      | p-value | Age adjusted PRR* |         |
|----------------------|------------------|---------|-------------------|---------|
|                      |                  |         | (95%CI)           | p-value |
| All Communities      | 1.01 (0.84-1.22) | 0.90    | 0.94 (0.78-1.13)  | 0.51    |
| Agrarian communities | 1.01 (0.71-1.43) | 0.95    | 0.85 (0.60-1.20)  | 0.35    |
| Trading Communities  | 0.93 (0.52-1.68) | 0.81    | 1.07 (0.59-1.94)  | 0.83    |
| Fishing Communities  | 0.87 (0.69-1.10) | 0.24    | 0.89 (0.70-1.12)  | 0.31    |

PRR=Prevalence Risk ratio; 95% CI= 95% confidence interval; RCCS=Rakai Community Cohort Study; adjPRR=adjusted PRR; \*Overall analysis for all communities adjusted for age and community-type.

**Supplementary Table 5:** Inverse probability weighted relative prevalence of self-reported ART use among in-migrants and out-migrants vs. long-term residents by age and sex.

| Age (years) | <b>HIV-positive women (N=2038), RCCS R15</b>                  |         |                                                                  |         | <b>HIV-positive women (N=2034), RCCS R16</b>                 |         |                                                                 |         |
|-------------|---------------------------------------------------------------|---------|------------------------------------------------------------------|---------|--------------------------------------------------------------|---------|-----------------------------------------------------------------|---------|
|             | Out-migrant vs. Long-term resident, PRR <sub>w</sub> (95% CI) | p-value | Out-migrant vs. Long-term resident, adjPRR <sub>w</sub> (95% CI) | p-value | In-migrant vs. Long-term resident, PRR <sub>w</sub> (95% CI) | p-value | In-migrant vs. Long-term resident, adjPRR <sub>w</sub> (95% CI) | p-value |
| 15-24       | 0.86 (0.47-1.56)                                              | 0.382   | 0.77 (0.43-1.38)                                                 | 0.382   | 0.55 (0.40-0.75)                                             | <0.001  | 0.57 (0.42-0.78)                                                | <0.001  |
| 25-35       | 0.84 (0.63-1.12)                                              | 0.248   | 0.84 (0.63-1.11)                                                 | 0.221   | 0.68 (0.58-0.81)                                             | <0.001  | 0.68 (0.57-0.80)                                                | <0.001  |
| 35-49       | 0.73 (0.55-0.98)                                              | 0.038   | 0.79 (0.59-1.11)                                                 | 0.103   | 0.71 (0.59-0.86)                                             | <0.001  | 0.73 (0.60-0.88)                                                | <0.001  |
| All         | 0.65 (0.53-0.79)                                              | <0.001  | 0.83 (0.69-1.01)                                                 | 0.063   | 0.59 (0.52-0.66)                                             | <0.001  | 0.67 (0.59-0.76)                                                | <0.001  |
| Age (years) | <b>HIV-positive men (N=1273), RCCS R15</b>                    |         |                                                                  |         | <b>HIV-positive men (N=1244), RCCS R16</b>                   |         |                                                                 |         |
|             | Out-migrant vs. Long-term resident, PRR <sub>w</sub> (95% CI) | p-value | Out-migrant vs. Long-term resident, adjPRR <sub>w</sub> (95% CI) | p-value | In-migrant vs. Long-term resident, PRR <sub>w</sub> (95% CI) | p-value | In-migrant vs. Long-term resident, adjPRR <sub>w</sub> (95% CI) | p-value |
| 15-24       | 0.37 (0.05-2.79)                                              | 0.362   | 0.41 (0.06-3.00)                                                 | 0.383   | 0.86 (0.24-3.11)                                             | 0.813   | 0.83 (0.25-2.72)                                                | 0.761   |
| 25-35       | 0.61 (0.33-1.12)                                              | 0.110   | 0.58 (0.32-1.08)                                                 | 0.088   | 0.77 (0.55-1.09)                                             | 0.139   | 0.80 (0.57-1.12)                                                | 0.196   |
| 35-49       | 0.63 (0.38-1.05)                                              | 0.074   | 0.63 (0.40-1.07)                                                 | 0.090   | 0.68 (0.50-0.92)                                             | 0.012   | 0.69 (0.51-0.93)                                                | 0.017   |
| All         | 0.53 (0.35-0.78)                                              | 0.001   | 0.59 (0.40-0.87)                                                 | 0.007   | 0.63 (0.50-0.79)                                             | <0.001  | 0.75 (0.59-0.94)                                                | 0.014   |

PRR=Prevalence Risk ratio; PRR<sub>w</sub>=Prevalence Risk ratio; 95% CI= 95% confidence interval; RCCS=Rakai Community Cohort Study; adjPRR=adjusted PRR; \*Age-stratified analyses adjusted for community type. Overall analysis for all communities adjusted for age and community-type.

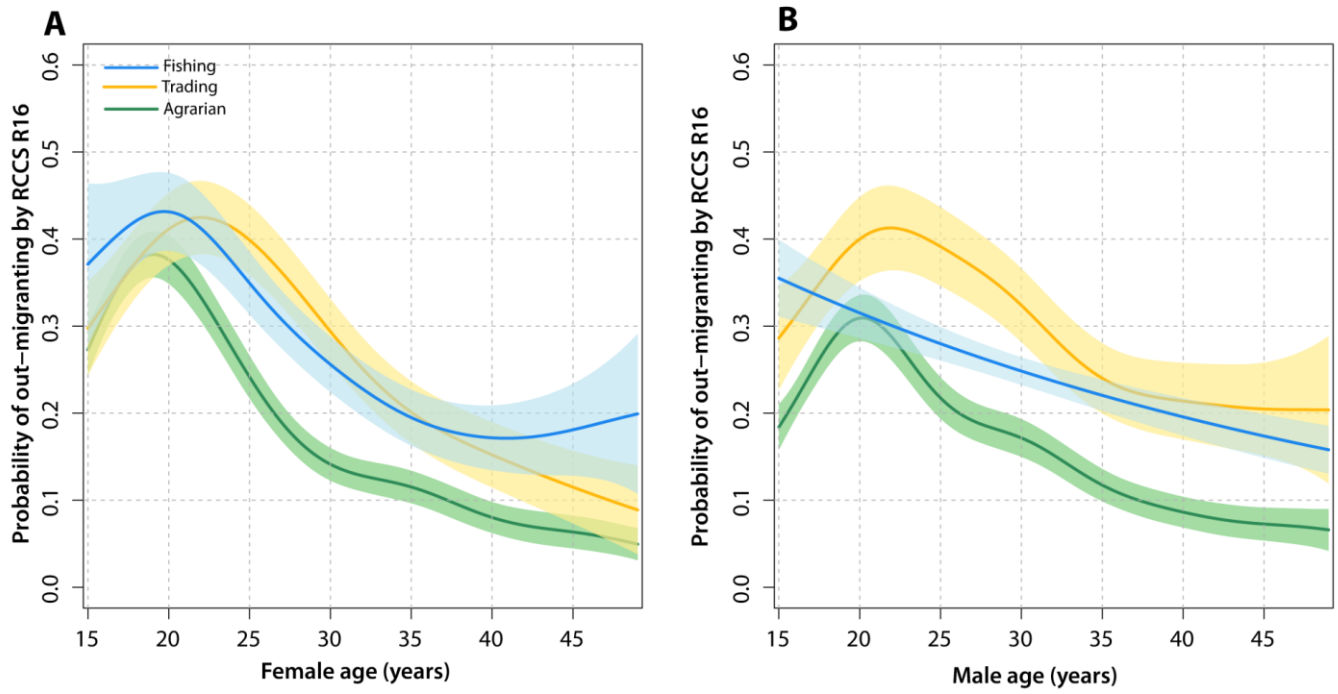

**Supplementary Figure 1.** Proportion of women (A) and men (B) at R15 being classified as an out-migrant by R16 by age and community-type with 95% confidence intervals shown in shaded areas.



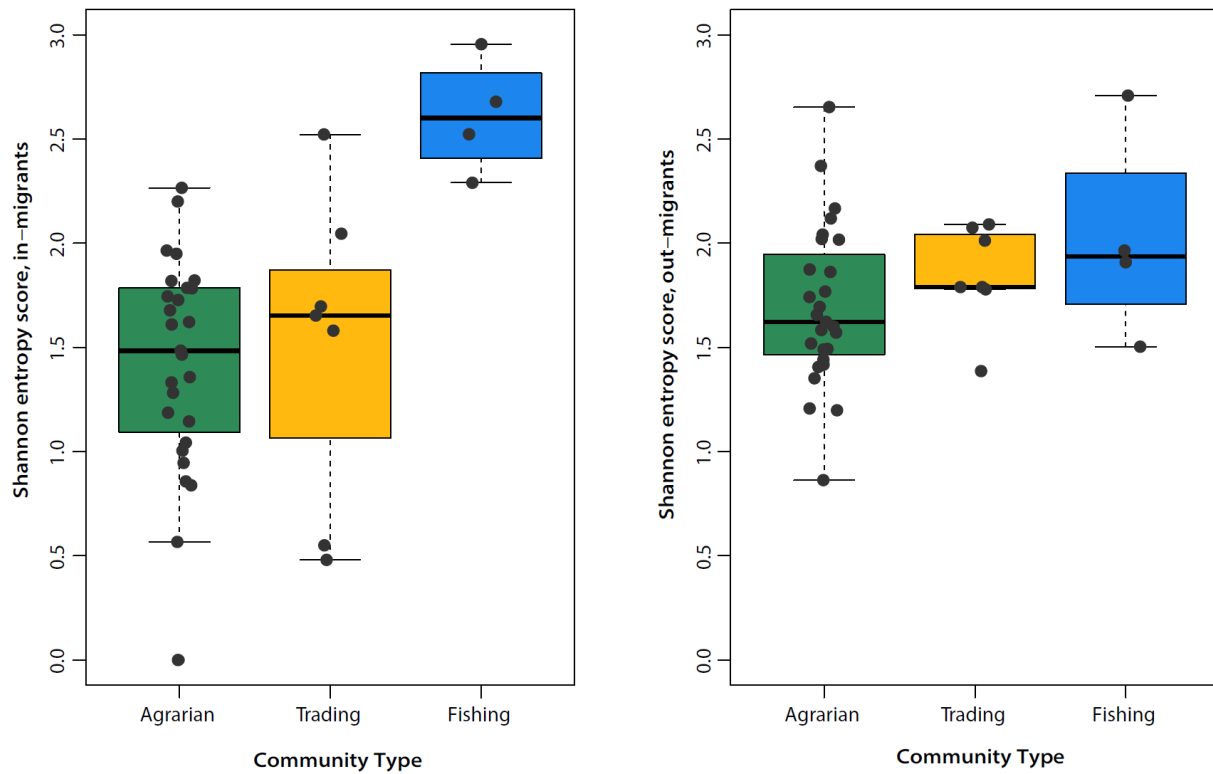

**Supplementary Figure 2: Boxplot of community-level Shannon entropy scores of the geographic diversity of source/destination locations measured at the district level (i.e., administrative unit 1) among in-migrants and out-migrants in RCCS agrarian, trading, and fishing communities.** The bottom and top of the boxes represent the 25<sup>th</sup> and 75<sup>th</sup> percentiles of the data (i.e., interquartile range), respectively. The median (50<sup>th</sup> percentile) is indicated in the middle of the box with a solid black line. Individual data points, representing each community's Shannon entropy score, are shown as dark gray circles. Box limits (whiskers) are plotted at 1.5 times the interquartile range.

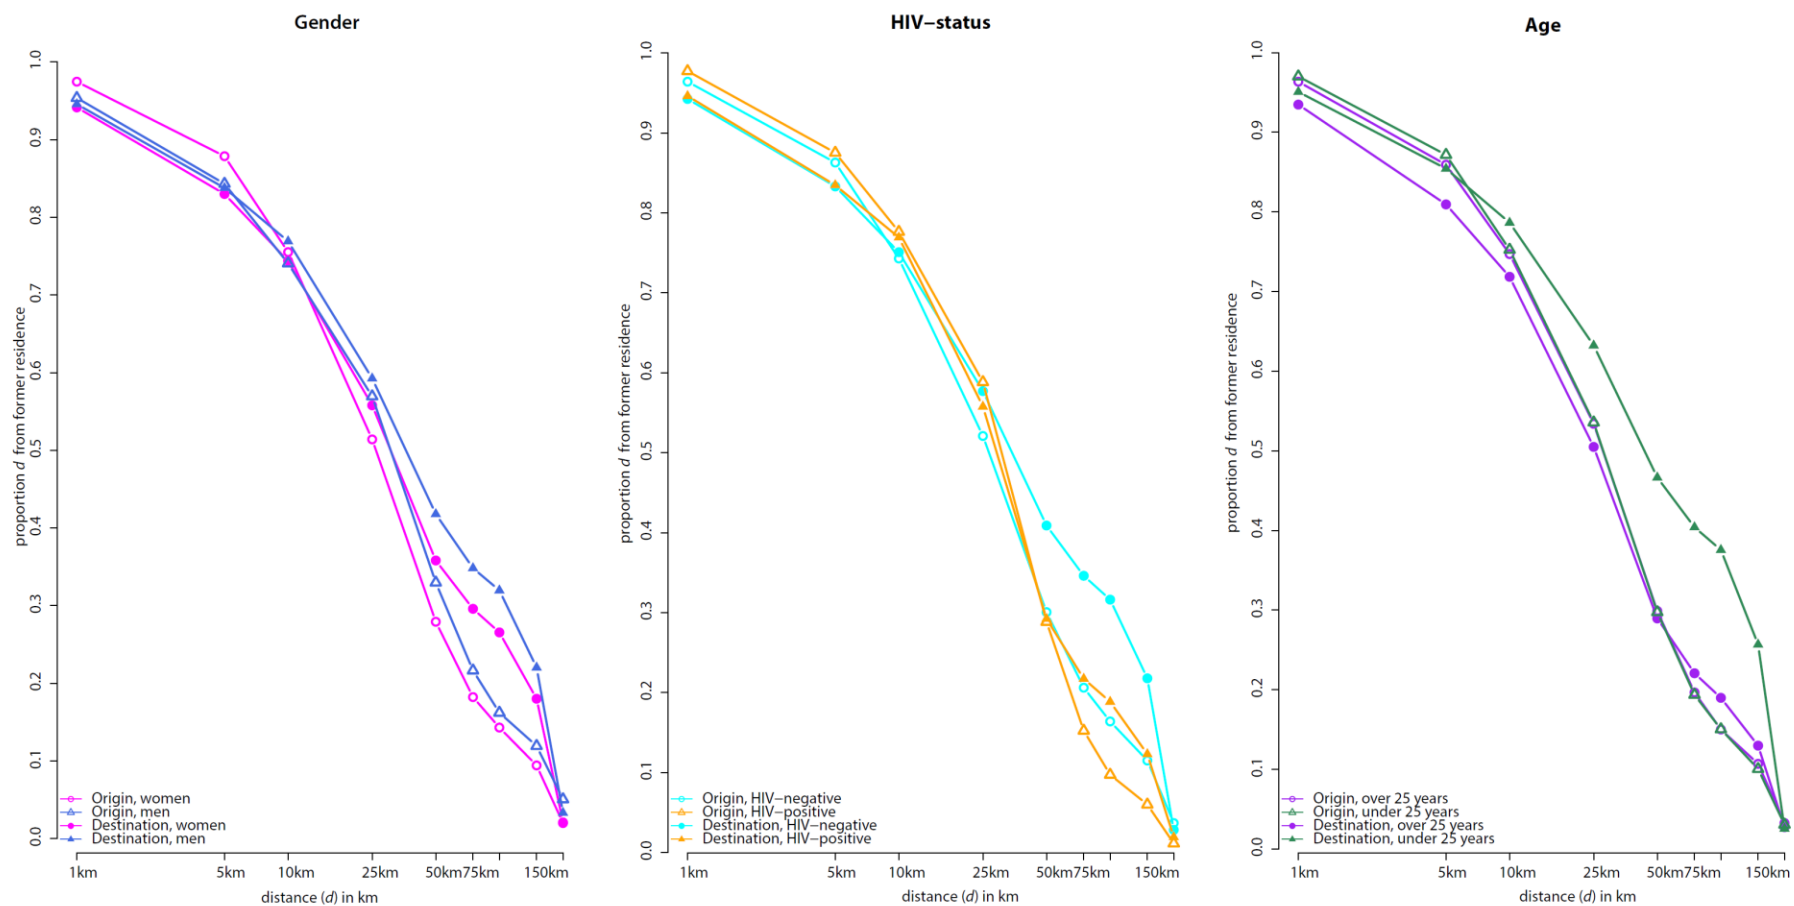

**Supplemental Figure 3. Inverse cumulative distance kernels for place of origin and destination for in-migrants and out migrants, respectively.** Figure shows proportion who migrated at (or further) particular distances from home. Distances ( $d$ ) are from the source/destination location of each participant to their current/former household in the RCCS in kilometers. Analyses are stratified by gender, HIV-status and age.
